# Supplementary material for: Platycodonis Radix Alleviates LPS-Induced Lung Inflammation through Modulation of TRPA1 Channels
Source: MDPI journal article supplement (doi:10.3390/molecules28135213), 2023-07-05
Supplement: s1 [file s1]

## supporting information

### 1. Five primary platycodins identified in of PR water extract

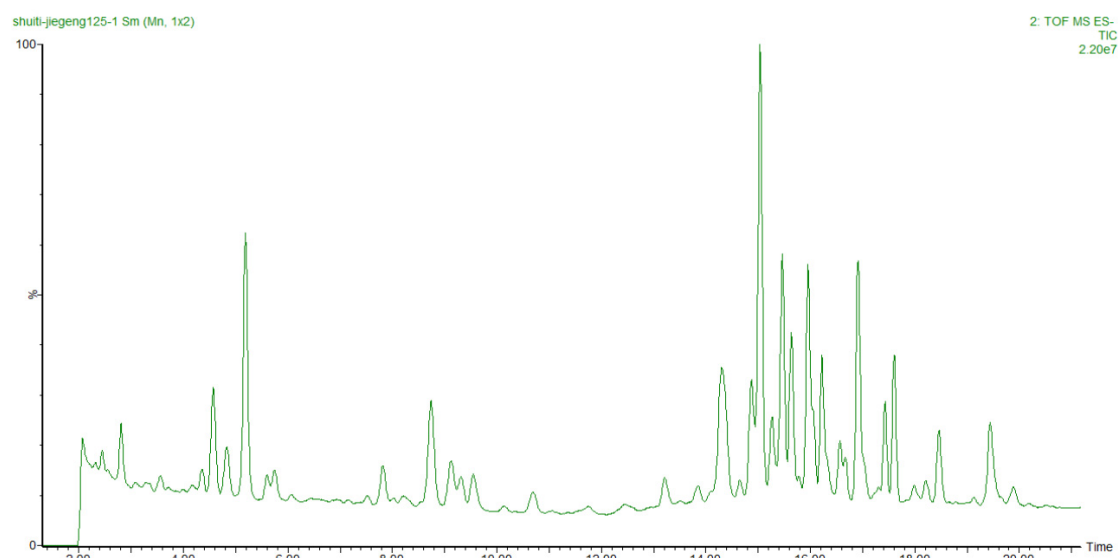

Figure S1 The total ion chromatograms of PR.

A

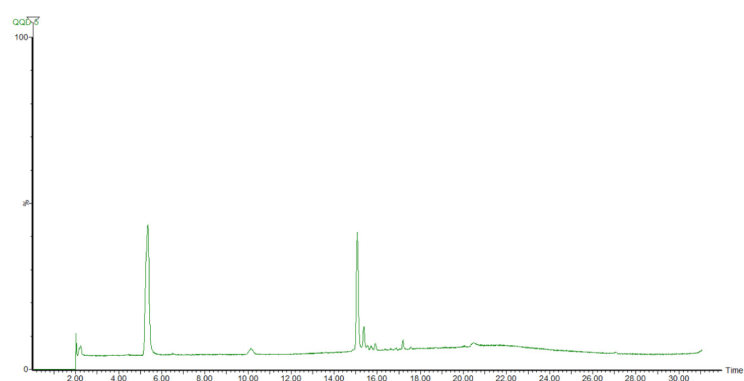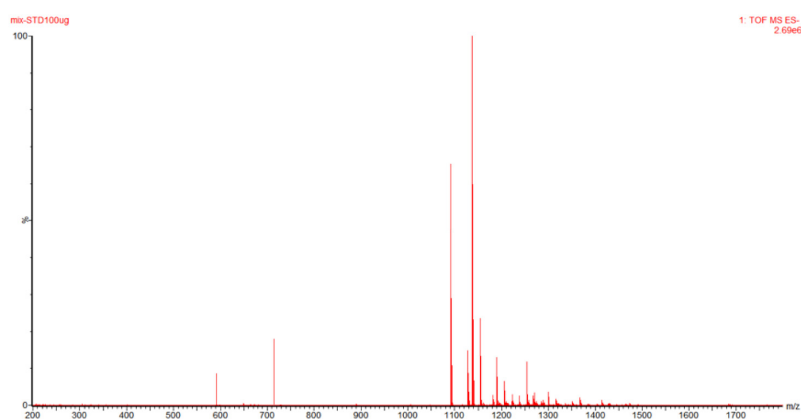

B

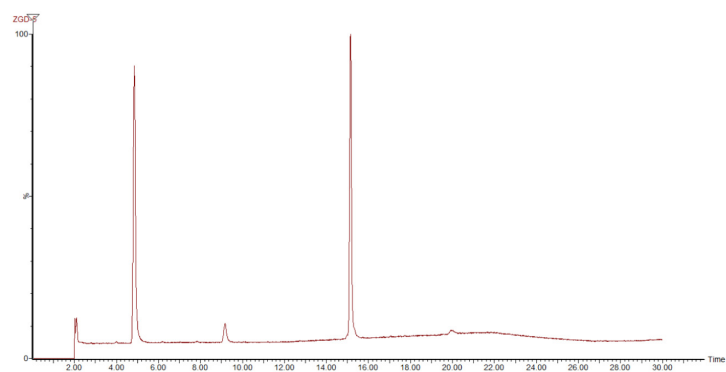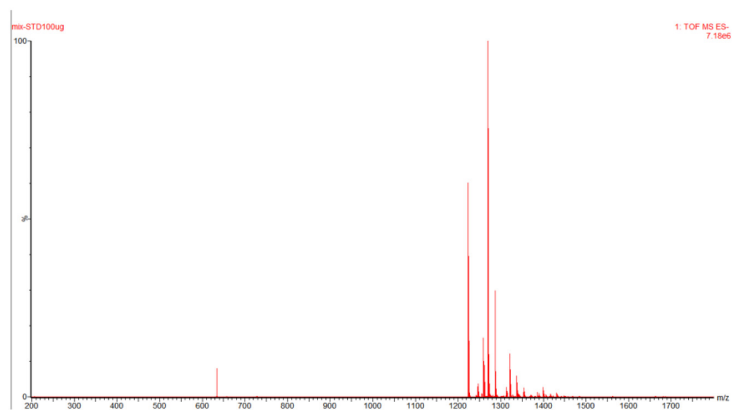

C

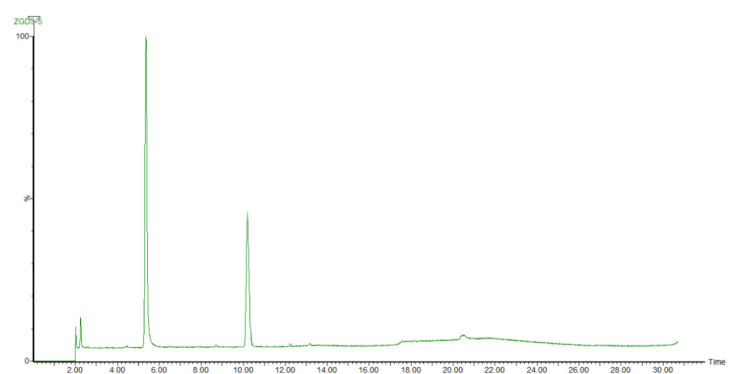



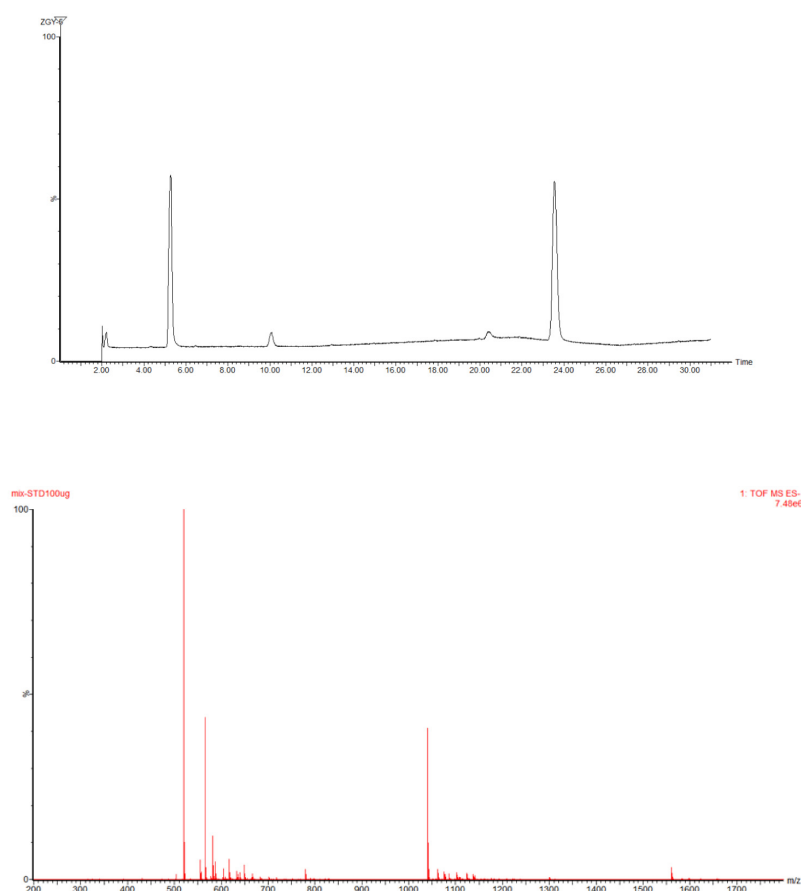

Figure S2 Ion chromatograms of the five main chemical components. A: Deapio Platycodin D; B: Platycodin D; C: Platycodin D<sub>3</sub>; D: Platycodin D<sub>2</sub>; E: Platycodigenin.

## 2. Analysis of total RNA integrity

The extracted total RNA was subjected to agarose gel electrophoresis and the results are shown in Figure S3. The 28s band was wider and brighter than the 18s band, confirming that the 28s band was approximately twice as wide and brighter than the 18s band in the RNA composition: the 5s band was lighter in colour, proving that the RNA was not degraded and had good integrity and could be further used for CDNA synthesis.

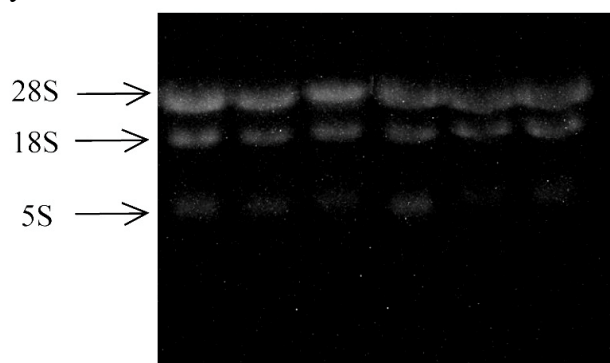

Figure S3 The gel electrophoresis of total RNA
